# Supplementary material for: Efficient removal of lead from highly acidic wastewater by periodic ion imprinted mesoporous SBA-15 organosilica combining metal coordination and co-condensation
Source: Royal Society of Chemistry journal article supplement (doi:10.1039/c5ta00820d), 2015-01-01
Supplement: c5ta00820d1.pdf [file c5ta00820d1.pdf]

## Supporting Information

### **Efficient Removal Lead in Highly Acidic Wastewater by Periodic Ion Imprinted Mesoporous SBA-15 Organosilica Combining Metal Coordination and Co-condensation**

Rong He,<sup>a</sup> Weiming Li,<sup>b</sup> Dayi Deng,<sup>a</sup> Wensen Chen,<sup>a</sup> He Li,<sup>a</sup> Chaohai Wei,<sup>c</sup> and Youwen Tang<sup>\*a</sup>

<sup>a</sup> *School of Chemistry and Environment, MOE Key Laboratory of Laser Life Science, South China Normal University, 510006, Guangzhou, China.*

<sup>b</sup> *Technical Service Center Laboratory of Panyu Entry-Exit Inspection & Quarantine Bureau, Guangzhou, China;*

<sup>c</sup> *The Key Lab of Pollution Control and Ecosystem Restoration in Industry Clusters, Ministry of Education, South China University of Technology, Guangzhou, China;*

\*Author to whom correspondence should be addressed. e-mail: tanglab@scnu.edu.cn

Summary: There are 3 pages including 4 table and 1 figures

**Table S1** Competitive adsorption ability of PbIMS and NIMS (pH 4.5)

| Competitive ions                     | PbIMS (mg/L)       |                   |                    | NIMS (mg/L)        |                   |                   | K'   |
|--------------------------------------|--------------------|-------------------|--------------------|--------------------|-------------------|-------------------|------|
|                                      | K <sub>d(Pb)</sub> | K <sub>d(M)</sub> | K <sub>PbIMS</sub> | K <sub>d(Pb)</sub> | K <sub>d(M)</sub> | K <sub>NIMS</sub> |      |
| Pb <sup>2+</sup> vs Zn <sup>2+</sup> | 2472.2             | 90.5              | 27.3               | 201.9              | 166.9             | 1.21              | 22.6 |
| Pb <sup>2+</sup> vs Cd <sup>2+</sup> | 2311.3             | 129.9             | 17.8               | 165.5              | 153.4             | 1.08              | 16.5 |
| Pb <sup>2+</sup> vs Cu <sup>2+</sup> | 2424.7             | 92.9              | 26.1               | 189.1              | 160.1             | 1.18              | 22.1 |
| Pb <sup>2+</sup> vs Mg <sup>2+</sup> | 2921.6             | 76.4              | 38.2               | 212.1              | 141.6             | 1.50              | 25.5 |
| Pb <sup>2+</sup> vs Ca <sup>2+</sup> | 2968.3             | 78.7              | 37.7               | 216.5              | 150.7             | 1.44              | 26.2 |
| Pb <sup>2+</sup> vs Fe <sup>3+</sup> | 2584.2             | 139.0             | 18.6               | 218.0              | 191.9             | 1.14              | 16.4 |

Experimental conditions: initial concentrations of metal ions 1mmol L<sup>-1</sup>, 10 mL solution, 10 mg sorbent, temperature 303K

**Table S2** Elution effect of 1 mol L<sup>-1</sup> HNO<sub>3</sub>

| Pb <sup>2+</sup> Init. Sol. (mg L <sup>-1</sup> ) | 25   | 50    | 100  | 200   | 300  | 400  |
|---------------------------------------------------|------|-------|------|-------|------|------|
| Recovery (%)                                      | 99.5 | 101.8 | 98.8 | 102.2 | 96.6 | 98.5 |

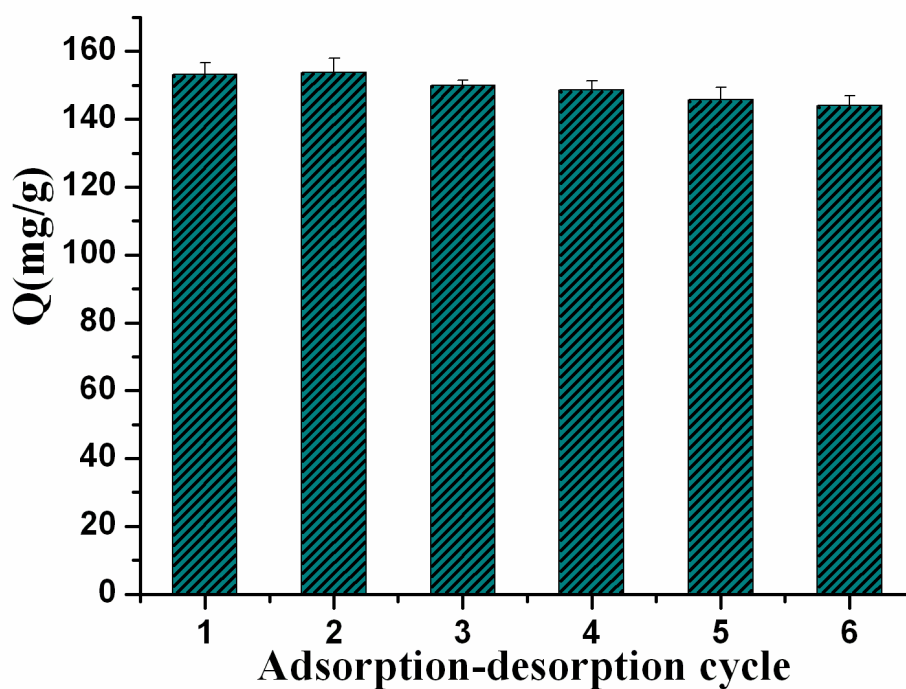**Figure S3** Reusability of PbIMS.

**Table S4** Reproducibility of PbIMS.

| <b>Number</b>                 | <b>1</b>         | <b>2</b>         | <b>3</b>         | <b>4</b>         | <b>5</b>         | <b>6</b>         |
|-------------------------------|------------------|------------------|------------------|------------------|------------------|------------------|
| <b>Q (mg/g)</b><br><b>n=3</b> | <b>147.9±3.4</b> | <b>149.7±3.7</b> | <b>148.1±4.1</b> | <b>150.5±4.5</b> | <b>141.8±3.6</b> | <b>138.9±3.3</b> |

**Table S5** Adsorption experiments of real sample

| <b>Ions<br/>(mg/L)</b> | <b>Mining Effluent</b>            |                                    | <b>Lead-acid Battery Wastewater</b> |                                    |
|------------------------|-----------------------------------|------------------------------------|-------------------------------------|------------------------------------|
|                        | <b>Initial<br/>Concentrations</b> | <b>Residual<br/>Concentrations</b> | <b>Initial<br/>Concentrations</b>   | <b>Residual<br/>Concentrations</b> |
| <b>Pb<sup>2+</sup></b> | 0.531                             | 0.042                              | 23.4                                | 0.310                              |
| <b>Zn<sup>2+</sup></b> | 0.842                             | 0.507                              | 2.65                                | 0.845                              |
| <b>Cd<sup>2+</sup></b> | 0.148                             | 0.052                              | 7.50                                | 1.52                               |
| <b>Cu<sup>2+</sup></b> | 4.06                              | 0.241                              | 1.00                                | 0.413                              |
| <b>Fe<sup>3+</sup></b> | 1.52                              | 0.191                              | 0.165                               | 0.085                              |
| <b>Mg<sup>2+</sup></b> | 1.63                              | 0.37                               | 0.374                               | 0.205                              |
